# Supplementary material for: Organization of the catecholaminergic system in the short-lived fish Nothobranchius furzeri
Source: bioRxiv or medRxiv preprint supplement (doi:10.1101/2021.06.30.450602), 2021-07-01
Supplement: Supplementary file [file media-1.pdf]

*Supplementary Material*

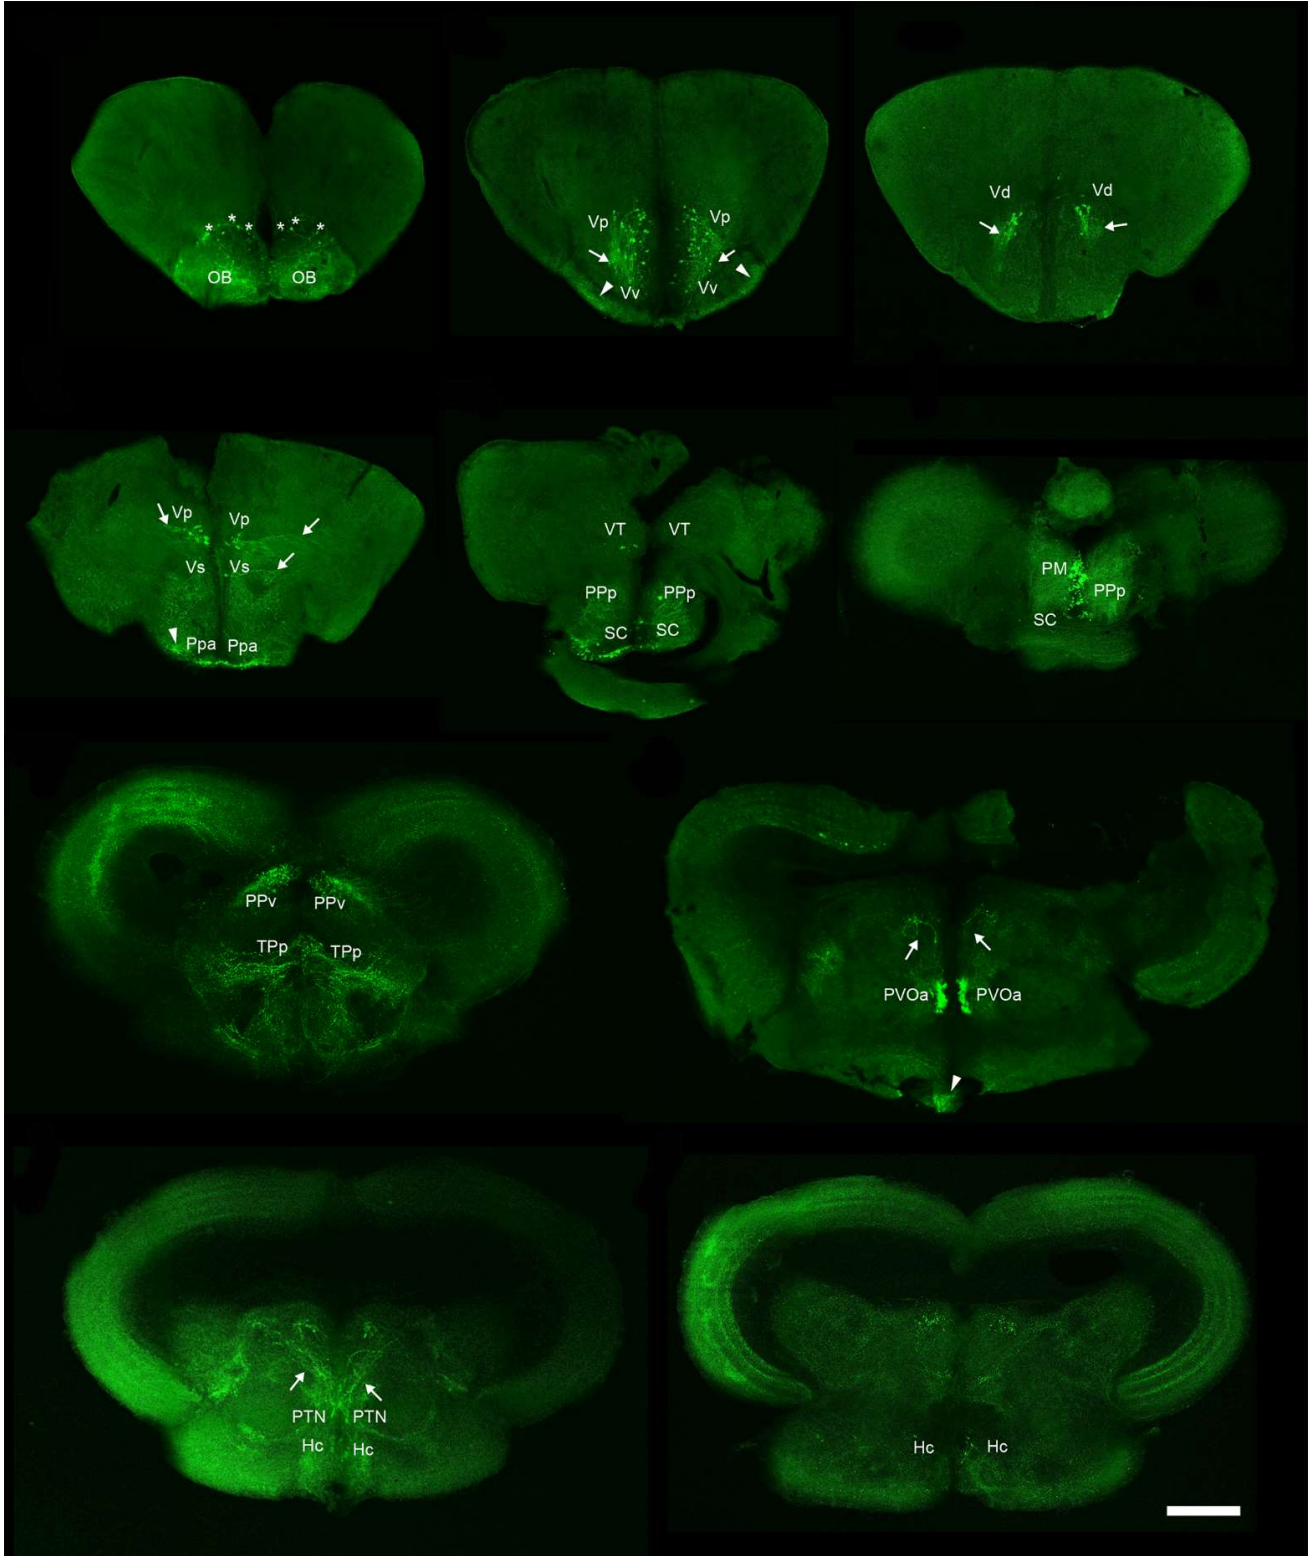

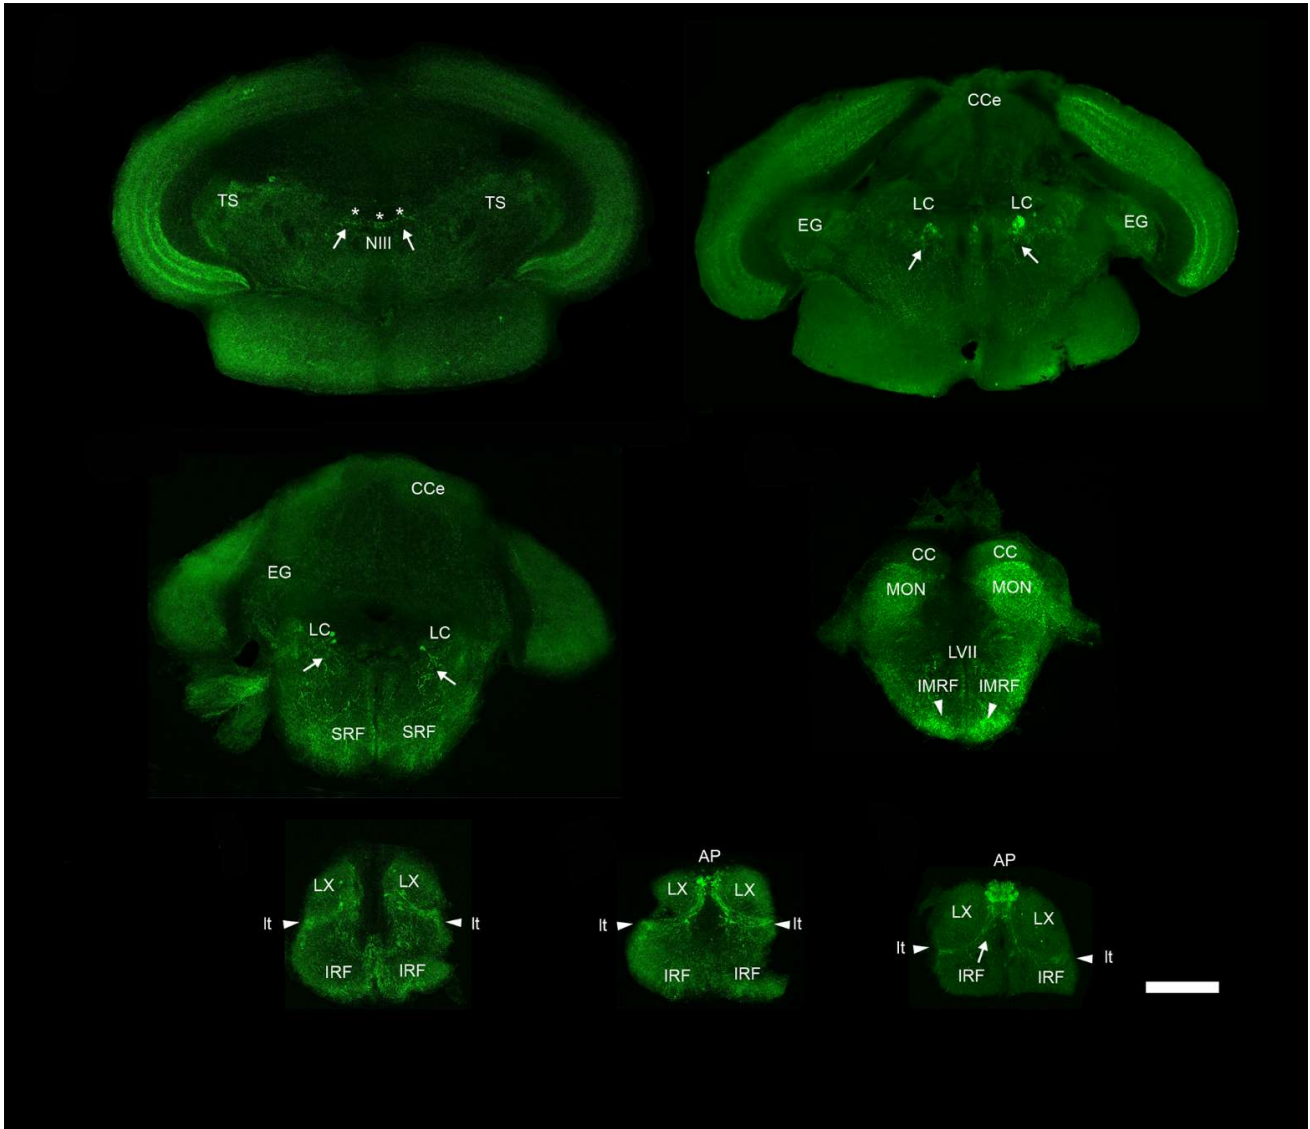

**Supplementary Figure 1. Photomicrographs of transverse sections (in rostral to caudal order) showing the anti-TH immunofluorescence in the brain of *Nothobranchius furzeri*.** Asterisks point neuronal somas, arrows show the direction of the processes and arrowheads indicate regions with intense density of TH+ neuropil or tracts. For more details see the text and for abbreviations see list. Scale bar, 500  $\mu$ m.

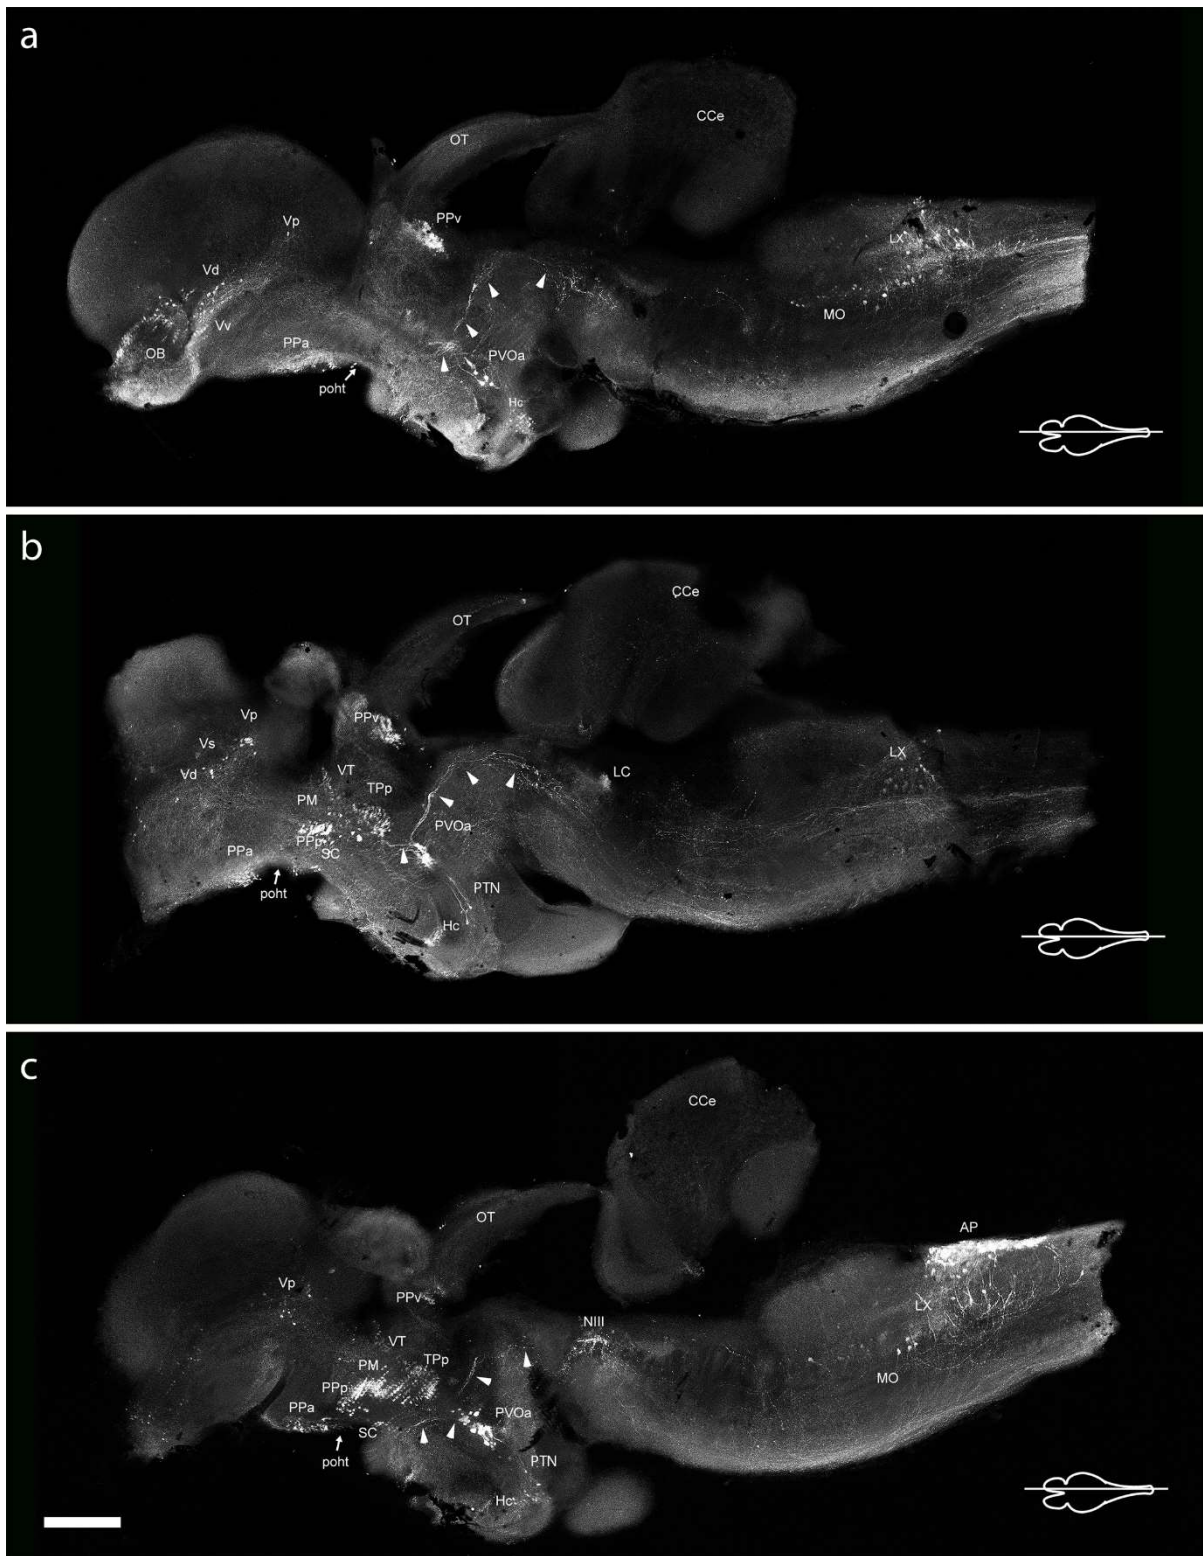

**Supplementary Figure 2. Photomicrographs of para-sagittal sections near the midline (from lateral towards the midline), showing the distribution of TH<sup>+</sup> neuronal groups and fibers/tracts through the brain of *Nothobranchius furzeri*. Arrowheads point to TH<sup>+</sup> fibers arising from the paraventricular organ-accompanying cells and arrows indicate the preopticohypothalamic tract. For more details see the text and for abbreviations see list. Scale bar, 500  $\mu$ m.**



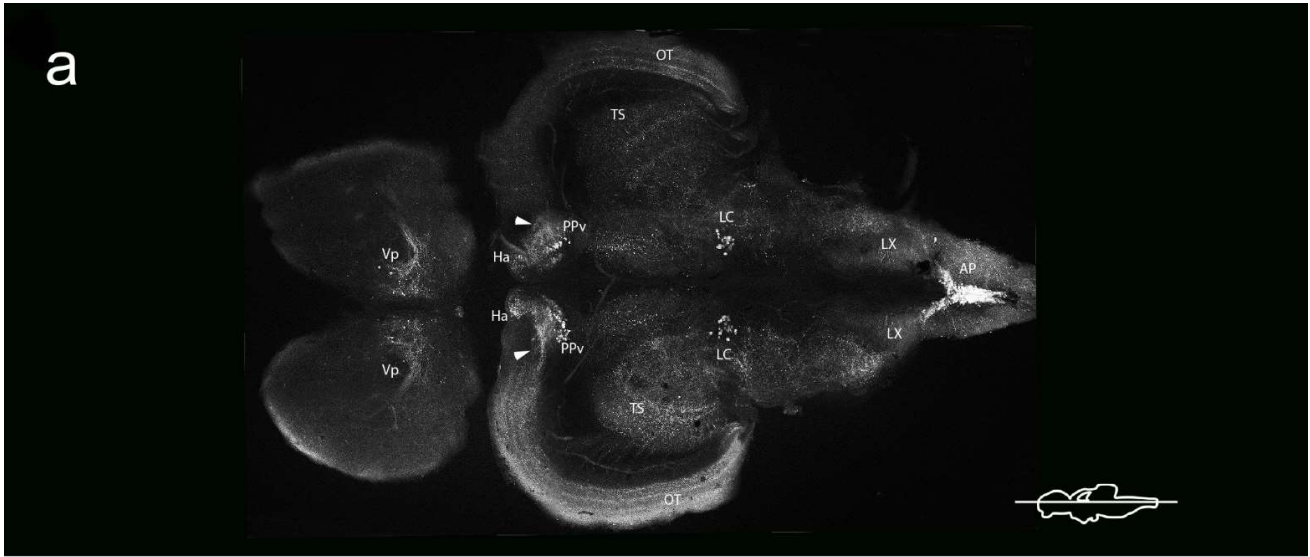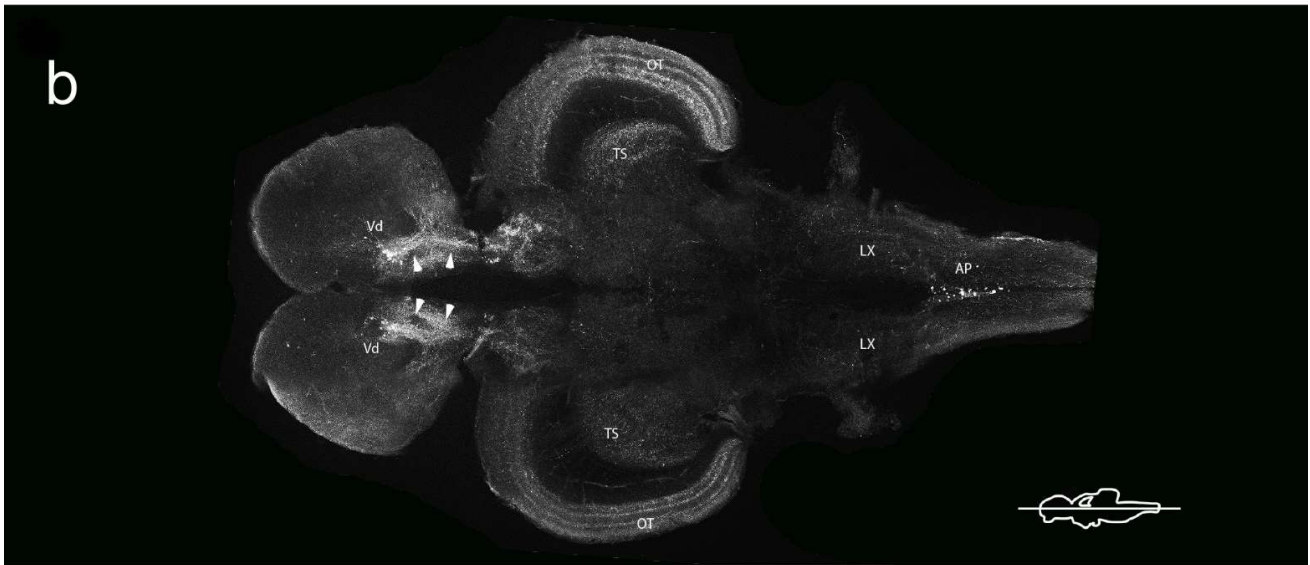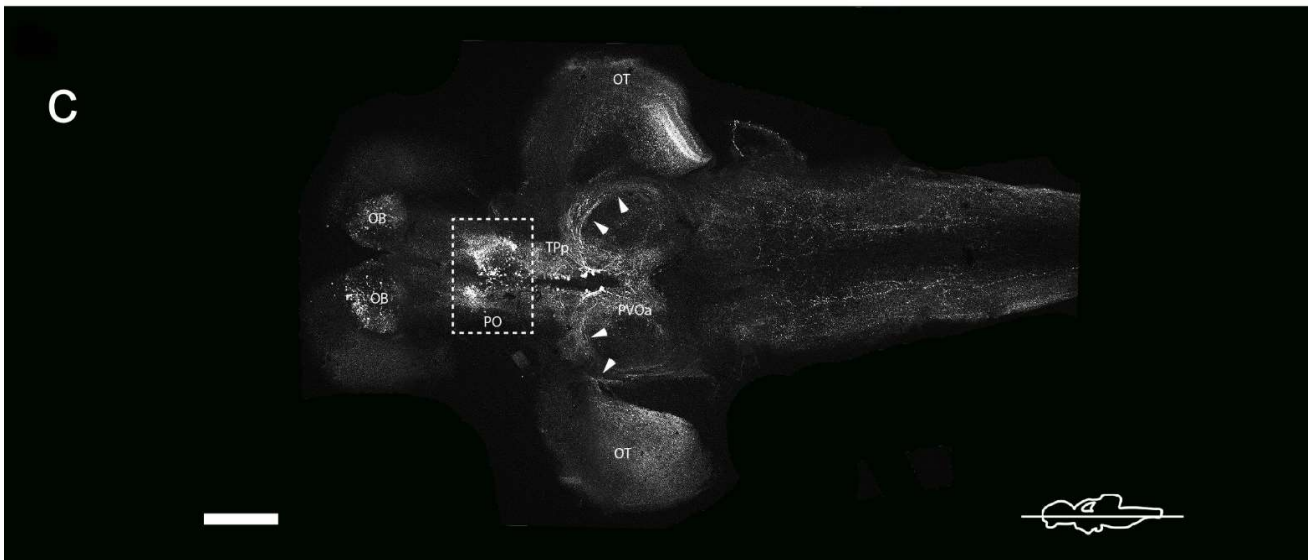

**Supplementary Figure 3. Photomicrographs of horizontal sections (in dorsal to ventral order) showing the distribution of TH<sup>+</sup> cellular groups and fibers/tracts along the rostrocaudal axis of the brain in *Nothobranchius furzeri*.** Arrowheads in **(A)** indicate the TH<sup>+</sup> fibers of the ventral periventricular pretectal nucleus reaching the optic tectum, in **(B)** the fibers from the posterior zone of ventral telencephalon following a caudal direction, and in **(C)** the direction of processes from the paraventricular organ-accompanying cells. For more details see the text and for abbreviations see list. Scale bar, 500  $\mu\text{m}$ .
